# Supplementary material for: Functional, Nutritional, and Sensory Quality of Mixed Flours-Based Breads as Compared to Durum Wheat Semolina-Based Breads
Source: MDPI journal article supplement (doi:10.3390/foods10071613), 2021-07-12
Supplement: s1 [file s1]

**Table S1.** Gross chemical composition (in percentage of fresh matter) of the flours used in this study.

|                      | Total carbohydrates | Sugars | Proteins | Total fats | Saturated fats | Fibres |
|----------------------|---------------------|--------|----------|------------|----------------|--------|
| Durum wheat semolina | 73.0                | 0.4    | 13.0     | 2.0        | 0.4            | 3.6    |
| Soft wheat (W=170)   | 73.0                | 0.4    | 10.0     | 2.0        | 0.4            | 2.0    |
| Soft wheat (W=330)   | 69.0                | 1.5    | 13.0     | 0.7        | 0.2            | 2.2    |
| Rye                  | 65.0                | 1.5    | 12.0     | 1.8        | 0.4            | 8.0    |
| Barley               | 78.0                | 0.8    | 10.3     | 1.8        | 0.4            | 7.1    |
| Oat                  | 62.0                | 1.2    | 12.6     | 7.1        | 1.3            | 7.6    |
| Buckwheat            | 69.0                | 0.4    | 12.3     | 2.0        | 0.7            | 12.3   |

**Table S2.** Technology performances of mixed-flours sourdough (MFS) after 10 and 20 days of propagation. Values (mean of three independent experiments analysed in duplicate  $\pm$  standard deviation) in the same row with at least one common superscript letter are not significantly different ( $P > 0.05$ ).

|                                                  | 10 days                      | 20 days                      |
|--------------------------------------------------|------------------------------|------------------------------|
| Cell density of lactic acid bacteria (log cfu/g) | 9.3 $\pm$ 0.3 <sup>a</sup>   | 9.6 $\pm$ 0.3 <sup>a</sup>   |
| Cell density of yeasts (log cfu/g)               | 7.4 $\pm$ 0.3 <sup>a</sup>   | 7.2 $\pm$ 0.2 <sup>a</sup>   |
| $\Delta$ pH <sup>§</sup>                         | 1.38 $\pm$ 0.05 <sup>a</sup> | 1.36 $\pm$ 0.04 <sup>a</sup> |
| $\Delta$ V <sup>†</sup> (ml)                     | 20 $\pm$ 1.0 <sup>a</sup>    | 20 $\pm$ 2.0 <sup>a</sup>    |

§  $\Delta$ pH was calculated as the difference between the values of pH at the beginning and end of daily fermentation; † Volume increase was calculated as the difference between the volume of the sourdough at the end and beginning of daily fermentation.

**Table S3.** Concentration (mg/kg) of volatile organic compounds detected in S-TMW, S-MFS, MF, MF-TWS, MF-MFS, and S breads.

| Class of compounds | Compound                  | S-TWS        | S-MFS        | MF           | MF-TWS       | MF-MFS       | S             |
|--------------------|---------------------------|--------------|--------------|--------------|--------------|--------------|---------------|
| Alcohols           | ethanol                   | 2.15±0.372ab | 2.07±0.182b  | 0.96±0.100c  | 1.05±0.008c  | 0.98±0.007c  | 2.67±0.264a   |
|                    | 1-propanol, 2-methyl-     | 0.09±0.021b  | 0.08±0.007b  | 0.08±0.012b  | 0.06±0.001b  | 0.07±0.001b  | 0.13±0.007a   |
|                    | 1-butanol, 3-methyl       | 1.46±0.021b  | 1.24±0.012c  | 0.71±0.035e  | 0.82±0.033d  | 0.72±0.044e  | 1.95±0.017a   |
|                    | 1-hexanol                 | 0.47±0.041a  | 0.23±0.008c  | 0.13±0.003d  | 0.23±0.011c  | 0.12±0.005d  | 0.28±0.003b   |
|                    | 2-furanmethanol           | 0.91±0.237a  | 0.61±0.006ab | 0.69±0.073ab | 0.57±0.101b  | 0.58±0.082b  | 0.83±0.003ab  |
|                    | 3-(methylthio)-1-propanol | 0.87±0.236a  | 0.66±0.015ab | 0.52±0.016b  | 0.51±0.049b  | 0.63±0.032ab | 0.63±0.017ab  |
|                    | 3-nonen-1-ol,             | 0.25±0.035a  | 0.21±0.003a  | 0.09±0.009b  | 0.08±0.001b  | 0.08±0.003b  | 0.25±0.007a   |
|                    | furfuryl alcohol          | 0.21±0.041a  | 0.21±0.011a  | 0.15±0.051a  | 0.13±0.067a  | 0.16±0.038a  | 0.18±0.013a   |
|                    | benzyl alcohol            | 1.88±0.393a  | 1.06±0.011b  | 1.07±0.021b  | 1.44±0.032ab | 1.17±0.042b  | 1.88±0.222a   |
|                    | phenylethyl alcohol       | 16.53±2.718a | 12.34±0.248b | 5.89±0.778c  | 6.14±0.141c  | 6.62±0.269c  | 13.98±0.852ab |
|                    | maltol                    | 0.32±0.053a  | 0.22±0.021ab | 0.15±0.001b  | 0.15±0.019b  | 0.17±0.055b  | 0.24±0.033ab  |
|                    | phenol                    | 0.15±0.037a  | 0.11±0.014ab | 0.14±0.036ab | 0.11±0.033ab | 0.07±0.008a  | 0.12±0.007ab  |
|                    | 2-butanol, 3-methyl-      | 0.20±0.026a  | 0.11±0.001c  | 0.06±0.01d   | 0.19±0.005ab | 0.15±0.018b  | 0.00e         |
|                    | 2-methoxy-4-vinylphenol   | 0.14±0.067ab | 0.15±0.011ab | 0.12±0.024ab | 0.12±0.001ab | 0.2±0.034a   | 0.08±0.011a   |
|                    | alpha-terpineol           | 0.00b        | 0.00b        | 0.08±0.046a  | 0.06±0.022a  | 0.08±0.004a  | 0.00b         |
| Aldehydes          | propanal, 2-methyl-       | 0.00b        | 0.01±0.014b  | 0.00b        | 0.00b        | 0.05±0.003a  | 0.00b         |
|                    | butanal, 2-methyl-        | 0.00b        | 0.06±0.004a  | 0.06±0.009a  | 0.06±0.012a  | 0.06±0.004a  | 0.02±0.017b   |
|                    | butanal, 3-methyl-        | 0.00c        | 0.14±0.008a  | 0.07±0.005b  | 0.11±0.008b  | 0.13±0.011a  | 0.02±0.018c   |
|                    | hexanal                   | 0.32±0.011a  | 0.29±0.008b  | 0.3±0.028ab  | 0.27±0.002b  | 0.28±0.006b  | 0.33±0.002a   |

|                   |                                         |               |              |               |               |              |              |
|-------------------|-----------------------------------------|---------------|--------------|---------------|---------------|--------------|--------------|
|                   | heptanal                                | 0.06±0.056ab  | 0.00b        | 0.11±0.007a   | 0.09±0.018ab  | 0.05±0.045ab | 0.04±0.042ab |
|                   | nonanal                                 | 0.23±0.088a   | 0.15±0.001a  | 0.21±0.008a   | 0.18±0.024a   | 0.17±0.003a  | 0.22±0.048a  |
|                   | 2-octenal                               | 0.08±0.013abc | 0.06±0.007c  | 0.07±0.021bc  | 0.11±0.007a   | 0.06±0.009c  | 0.11±0.004ab |
|                   | decanal                                 | 0.45±0.072a   | 0.34±0.002b  | 0.31±0.003b   | 0.28±0.046b   | 0.33±0.042b  | 0.35±0.008ab |
|                   | benzaldehyde                            | 0.79±0.036ab  | 0.65±0.054bc | 0.74±0.009abc | 0.75±0.076abc | 0.86±0.105a  | 0.58±0.027c  |
|                   | 2-nonenal                               | 0.87±0.135a   | 0.64±0.011b  | 0.37±0.019c   | 0.37±0.084c   | 0.33±0.034c  | 0.69±0.064ab |
|                   | 2-furancarboxaldehyde, 5-methyl         | 0.61±0.124b   | 0.78±0.012ab | 0.69±0.062b   | 0.75±0.137ab  | 0.99±0.127a  | 0.35±0.015c  |
|                   | 2-phenyl-2-butenal                      | 0.00b         | 0.06±0.003a  | 0.00b         | 0.00b         | 0.06±0.012a  | 0.00b        |
| Alkanes           | 1-hexyl-2-nitrocyclohexane              | 0.04±0.038a   | 0.02±0.021a  | 0.06±0.002a   | 0.06±0.002a   | 0.06±0.001a  | 0.02±0.024a  |
|                   | nonadecane                              | 0.13±0.023b   | 0.12±0.006b  | 0.05±0.005c   | 0.05±0.001c   | 0.05±0.006c  | 0.18±0.002a  |
|                   | pentadecane                             | 0.18±0.053a   | 0.11±0.009b  | 0.00c         | 0.00c         | 0.00c        | 0.15±0.001ab |
|                   | heneicosane                             | 0.08±0.011a   | 0.06±0.005a  | 0.08±0.001a   | 0.07±0.004a   | 0.07±0.012a  | 0.08±0.014a  |
|                   | d-limonene                              | 0.00c         | 0.00c        | 0.3±0.028b    | 0.26±0.005b   | 0.36±0.043a  | 0.00c        |
| Benzene compounds | benzene, butyl-                         | 0.00a         | 0.00a        | 0.05±0.053a   | 0.05±0.054a   | 0.07±0.068a  | 0.00a        |
|                   | benzaldehyde, 2-hydroxy-                | 0.00b         | 0.00b        | 0.31±0.013a   | 0.27±0.057a   | 0.33±0.046a  | 0.00b        |
| Esters            | ethyl acetate                           | 0.09±0.017ab  | 0.08±0.004b  | 0.09±0.007ab  | 0.08±0.005b   | 0.08±0.001b  | 0.11±0.009a  |
|                   | hexanoic acid, 2-methyl-                | 0.14±0.031a   | 0.13±0.001a  | 0.00b         | 0.00b         | 0.05±0.049b  | 0.14±0.004a  |
|                   | octanoic acid, ethyl ester              | 0.77±0.108ab  | 0.78±0.005ab | 0.86±0.024ab  | 0.86±0.087ab  | 0.98±0.123a  | 0.69±0.019b  |
|                   | 2-octanoic acid, 2'-hexyl-,methyl ester | 0.21±0.004a   | 0.15±0.004bc | 0.12±0.008cd  | 0.11±0.019d   | 0.12±0.022cd | 0.17±0.009b  |
|                   | decanoic acid, ethyl ester              | 0.28±0.041a   | 0.22±0.003b  | 0.19±0.014bc  | 0.17±0.011bc  | 0.16±0.009c  | 0.31±0.004a  |

|                        |                                       |              |               |               |              |              |              |
|------------------------|---------------------------------------|--------------|---------------|---------------|--------------|--------------|--------------|
|                        | benzeneacetic acid, ethyl ester       | 0.00c        | 0.00c         | 0.04±0.015b   | 0.05±0.008b  | 0.08±0.009a  | 0.00c        |
|                        | acetic acid, 2-phenylethyl ester      | 0.26±0.048a  | 0.23±0.002a   | 0.09±0.009c   | 0.11±0.001c  | 0.11±0.005c  | 0.17±0.009b  |
|                        | nonanoic acid, nonyl ester            | 0.29±0.055b  | 0.13±0.003c   | 0.25±0.007b   | 0.48±0.062a  | 0.14±0.001c  | 0.27±0.003b  |
|                        | hexadecanoic acid, ethyl ester        | 0.11±0.021ab | 0.07±0.004b   | 0.08±0.005b   | 0.1±0.011ab  | 0.07±0.018b  | 0.11±0.004a  |
| Heterocyclic compounds | furan, 2-pentyl-                      | 0.64±0.022a  | 0.37±0.026c   | 0.53±0.062ab  | 0.61±0.046a  | 0.58±0.083ab | 0.46±0.012bc |
|                        | furfural                              | 1.58±0.257bc | 1.96±0.006b   | 2.35±0.163b   | 2.31±0.554b  | 3.17±0.311a  | 0.91±0.041c  |
|                        | indole                                | 0.15±0.059a  | 0.11±0.01ab   | 0.06±0.011b   | 0.07±0.016b  | 0.08±0.001ab | 0.11±0.011ab |
|                        | benzeneacetaldehyde                   | 0.32±0.039c  | 0.45±0.006b   | 0.35±0.001bc  | 0.38±0.048bc | 0.78±0.072a  | 0.18±0.033d  |
|                        | 2-acetyl-pyridine                     | 0.18±0.029ab | 0.16±0.006b   | 0.29±0.016a   | 0.25±0.046ab | 0.21±0.082ab | 0.14±0.005b  |
|                        | 1h-pyrrole, 2-methyl-                 | 0.07±0.017bc | 0.07±0.003bc  | 0.11±0.006a   | 0.09±0.018ab | 0.12±0.011a  | 0.05±0.006c  |
|                        | 1h-pyrrole, 1-(2-furanylmethyl)-      | 0.21±0.062bc | 0.21±0.002bc  | 0.33±0.031b   | 0.31±0.079b  | 0.51±0.094a  | 0.12±0.024c  |
|                        | 2-acetyl-1-pyrroline                  | 0.08±0.02ab  | 0.09±0.006ab  | 0.07±0.004ab  | 0.07±0.011ab | 0.11±0.025a  | 0.06±0.002a  |
|                        | 1h-pyrrole-2-carboxaldehyde           | 0.00c        | 0.04±0.002b   | 0.05±0.011b   | 0.06±0.013b  | 0.11±0.031a  | 0.00c        |
|                        | 4-hydroxy-2,5-dimethyl-3(2h)-furanone | 0.23±0.039a  | 0.16±0.007bc  | 0.09±0.003d   | 0.13±0.005cd | 0.11±0.018cd | 0.19±0.023ab |
|                        | 1-furfuryl-pyrrol                     | 0.00c        | 0.02±0.016bc  | 0.03±0.004bc  | 0.05±0.008b  | 0.11±0.027a  | 0.00c        |
| Ketones                | acetoin                               | 0.16±0.022b  | 0.08±0.001c   | 0.24±0.041a   | 0.16±0.016b  | 0.07±0.006c  | 0.18±0.001b  |
|                        | 2-nonanone                            | 0.32±0.046a  | 0.27±0.005abc | 0.22±0.021bce | 0.21±0.002d  | 0.21±0.004cd | 0.27±0.018ab |
| Organic acids          | acetic acid                           | 0.61±0.167b  | 0.72±0.028b   | 0.29±0.003c   | 0.61±0.081b  | 1.11±0.065a  | 0.11±0.001c  |
|                        | hexanoic acid                         | 0.54±0.115a  | 0.42±0.006ab  | 0.26±0.024c   | 0.33±0.011bc | 0.37±0.025bc | 0.33±0.007bc |
|                        | octanoic acid                         | 0.59±0.131ab | 0.35±0.003b   | 0.31±0.129b   | 0.48±0.119ab | 0.31±0.104b  | 0.73±0.091a  |

|           |                                |              |              |              |              |              |              |
|-----------|--------------------------------|--------------|--------------|--------------|--------------|--------------|--------------|
|           | n-hexadecanoic acid            | 0.08±0.075a  | 0.04±0.044a  | 0.00a        | 0.00a        | 0.00a        | 0.04±0.044a  |
|           | dodecanoic acid                | 0.05±0.051a  | 0.00a        | 0.00a        | 0.00a        | 0.00a        | 0.00a        |
| Pyrazines | pyrazine, methyl-              | 0.64±0.167ab | 0.58±0.017ab | 0.73±0.057a  | 0.56±0.168ab | 0.52±0.011ab | 0.41±0.016b  |
|           | pyrazine, 2,5-dimethyl-        | 0.39±0.052a  | 0.42±0.016a  | 0.43±0.023a  | 0.37±0.053a  | 0.41±0.065a  | 0.35±0.021a  |
|           | pyrazine, 2,6-dimethyl-        | 0.35±0.047a  | 0.33±0.034ab | 0.26±0.025ab | 0.23±0.046b  | 0.24±0.053ab | 0.32±0.021ab |
|           | pyrazine, 2,3-dimethyl-        | 0.18±0.011ab | 0.11±0.035bc | 0.23±0.031a  | 0.18±0.047a  | 0.17±0.031ab | 0.07±0.001c  |
|           | pyrazine, 2-ethyl-6-methyl-    | 0.41±0.05bc  | 0.44±0.006bc | 0.69±0.088a  | 0.58±0.137ab | 0.73±0.129a  | 0.28±0.003c  |
|           | pyrazine, 2-ethyl-5-methyl-    | 0.27±0.059a  | 0.28±0.002a  | 0.28±0.017a  | 0.25±0.081a  | 0.32±0.041a  | 0.11±0.004b  |
|           | pyrazine, 2-ethyl-3-methyl-    | 0.36±0.066ab | 0.37±0.004ab | 0.55±0.085a  | 0.47±0.123a  | 0.55±0.094a  | 0.23±0.003b  |
|           | pyrazine, 2,6-diethyl-         | 0.46±0.015a  | 0.46±0.039a  | 0.35±0.043ab | 0.31±0.063b  | 0.41±0.073ab | 0.38±0.001ab |
|           | pyrazine, 3,5-diethyl-2-methyl | 0.11±0.009b  | 0.14±0.002b  | 0.15±0.011b  | 0.15±0.042b  | 0.27±0.052a  | 0.08±0.006b  |
|           | pyrazine, (1-methylethenyl)-   | 0.11±0.016b  | 0.08±0.002b  | 0.11±0.003b  | 0.11±0.014ab | 0.15±0.017a  | 0.03±0.029c  |
|           | pyrazine, 2-ethenyl-6-methyl-  | 0.11±0.005a  | 0.07±0.005cd | 0.11±0.001ab | 0.08±0.018bc | 0.05±0.011d  | 0.12±0.009a  |
|           | pyrazine, ethyl-               | 0.29±0.07ab  | 0.26±0.007b  | 0.44±0.061a  | 0.37±0.073ab | 0.45±0.102a  | 0.19±0.023b  |

Values (mean of three independent experiments analysed in duplicate ± standard deviation) in the same row with different superscript letters are significantly different ( $P < 0.05$ ).
